# Supplementary material for: Sound Symbolism Facilitates Word Learning in 14-Month-Olds
Source: PubMed Central journal article supplement (PMC4335030; doi:10.1371/journal.pone.0116494), 2015-02-19
Supplement: pone.0116494.s001.pdf [file pone.0116494.s001.pdf]

## Appendix S1: The stimuli construction

1

2 Adult Arabic (n = 18), Japanese (n = 98) and English (n = 83) speakers were asked to choose one of the 17 candidate words for each of  
3 six shapes, and Table S1 illustrates the average percentage that each word was selected as the best match across all three variations of  
4 smooth/round shapes, and three variations of spiky/jagged shapes. The words *moma* and *kipi* were selected because adults frequently  
5 chose these as the best match for the smooth/round and spiky/jagged shapes, respectively (*kiki* was only later excluded—although not a  
6 word in Japanese, it is the name of a popular movie character, and in English it is a possible first name).

7

8 Table S1. Average percent of the time that each word was chosen as the best match for rounded and spiky objects

|                 | <b>Kipi</b> | Kiki    | kipu   | kupi  | Kupu  | Piki   | Pipu  | puki   | <b>moma</b> | mamo   | Mana   | mano  | Mona  | namo   | noma   | nona   | nono   |
|-----------------|-------------|---------|--------|-------|-------|--------|-------|--------|-------------|--------|--------|-------|-------|--------|--------|--------|--------|
| Rounded objects |             |         |        |       |       |        |       |        |             |        |        |       |       |        |        |        |        |
| Japanese        | 0.51%       | 0.41%   | 0.71%  | 1.46% | 4.75% | 0.21%  | 4.14% | 2.78%  | 9.16%       | 9.26%  | 7.10%  | 8.21% | 7.60% | 8.38%  | 10.52% | 10.39% | 14.40% |
| English         | 2.20%       | 0.97%   | 2.37%  | 1.58% | 4.31% | 1.14%  | 4.56% | 2.28%  | 13.24%      | 13.08% | 10.73% | 6.34% | 7.75% | 6.78%  | 6.86%  | 6.84%  | 8.96%  |
| Arabic          | 0.37%       | 0.96%   | 2.45%  | 3.19% | 5.30% | 1.69%  | 6.91% | 5.64%  | 11.90%      | 8.63%  | 5.87%  | 8.25% | 7.51% | 10.66% | 6.04%  | 6.94%  | 7.70%  |
| Average         | 1.03%       | 0.78%   | 1.85%  | 2.08% | 4.79% | 1.01%  | 5.21% | 3.57%  | 11.43%      | 10.32% | 7.90%  | 7.60% | 7.62% | 8.61%  | 7.81%  | 8.06%  | 10.35% |
| Spiky objects   |             |         |        |       |       |        |       |        |             |        |        |       |       |        |        |        |        |
| Japanese        | 23.39%      | 24.25%  | 10.34% | 8.70% | 5.13% | 13.13% | 3.74% | 7.04%  | 0.37%       | 0.51%  | 0.48%  | 0.44% | 0.27% | 0.61%  | 0.44%  | 0.78%  | 0.37%  |
| English         | 11.53%      | 14.59%  | 9.33%  | 7.30% | 8.80% | 13.02% | 7.21% | 9.50%  | 0.35%       | 0.97%  | 3.08%  | 2.19% | 0.71% | 4.31%  | 1.50%  | 2.55%  | 3.07%  |
| Arabic          | 13.37%      | 19.15%  | 9.23%  | 8.35% | 5.28% | 13.62% | 6.60% | 12.31% | 1.91%       | 0.38%  | 1.51%  | 0.95% | 1.71% | 2.05%  | 0.57%  | 1.68%  | 1.32%  |
| Average         | 16.10%      | 19.33*% | 9.63%  | 8.12% | 6.40% | 13.26% | 5.85% | 9.62%  | 0.88%       | 0.62%  | 1.69%  | 1.19% | 0.90% | 2.32%  | 0.83%  | 1.67%  | 1.59%  |

9 \**kiki* was not chosen because this can be an existing proper name in English and Japanese.
